# Supplementary figures and images for: miR-511 Deficiency Protects Mice from Experimental Colitis by Reducing TLR3 and TLR4 Responses via WD Repeat and FYVE-Domain-Containing Protein 1
Source: MDPI journal article supplement (doi:10.3390/cells11010058), 2021-12-25

a)

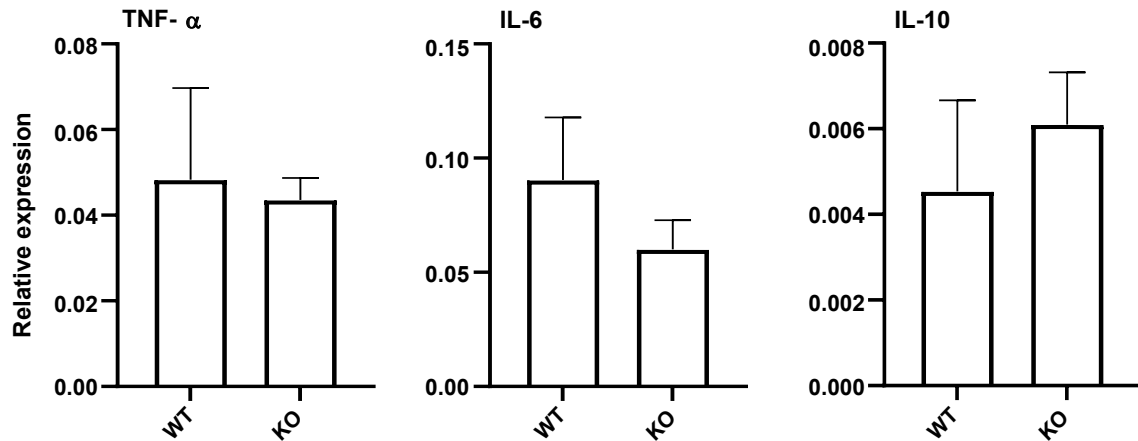

a)

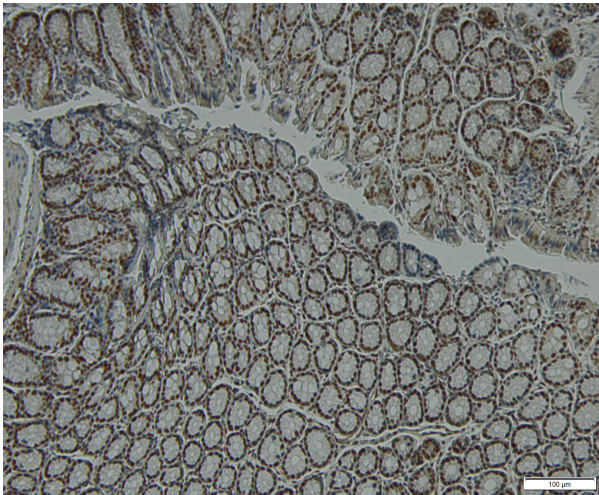

WT

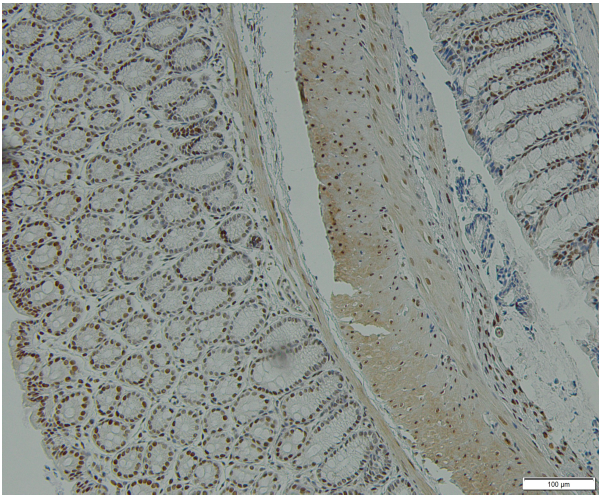

KO

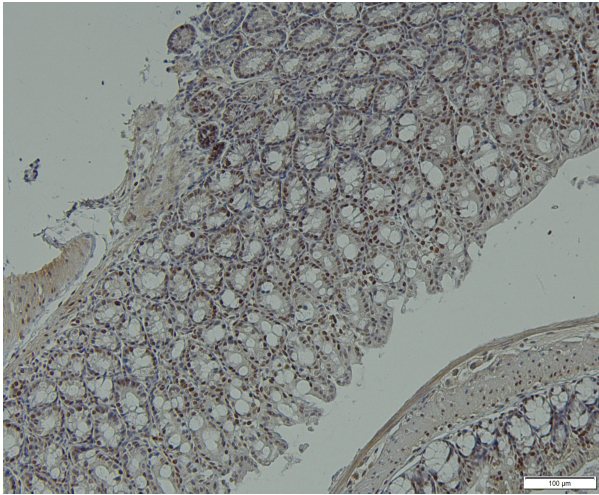

WT+DSS

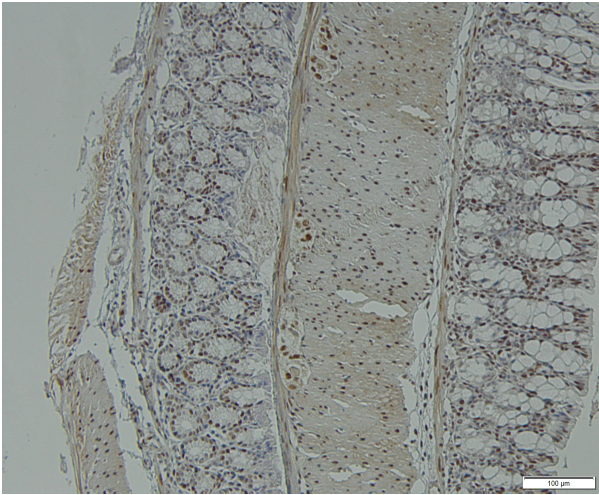

KO+DSS

b)

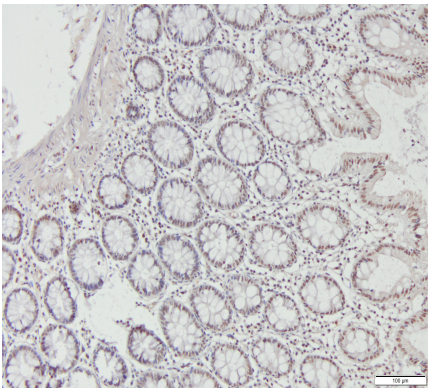

Healthy control

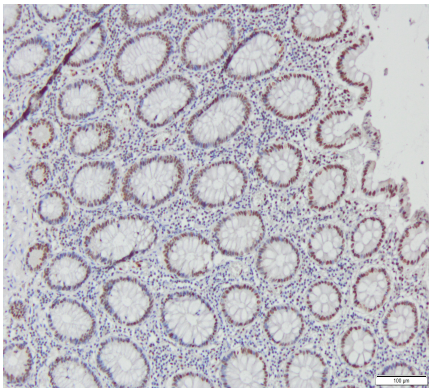

Non-inflamed

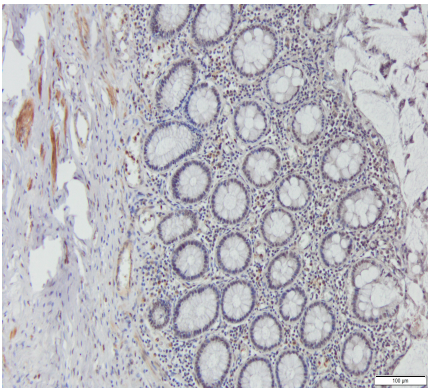

Inflamed

Supplement: s1 [file s1]
